# Supplementary material for: Lipid droplets modulate proteostasis, SQST-1/SQSTM1 dynamics, and lifespan in C. elegans
Source: PubMed Central journal article supplement (PMC10551902; doi:10.1016/j.isci.2023.107960), 2023-09-16
Supplement: mmc1.pdf [file mmc1.pdf]

## Supplemental information

### Lipid droplets modulate proteostasis, SQST-1/SQSTM1 dynamics, and lifespan in *C. elegans*

Anita V. Kumar, Joslyn Mills, Wesley M. Parker, Joshua A. Leitão, Diego I. Rodriguez, Sandrine E. Daigle, Celeste Ng, Rishi Patel, Joseph L. Aguilera, Joseph R. Johnson, Shi Quan Wong, and Louis R. Lapierre

# Supplemental Figure 1

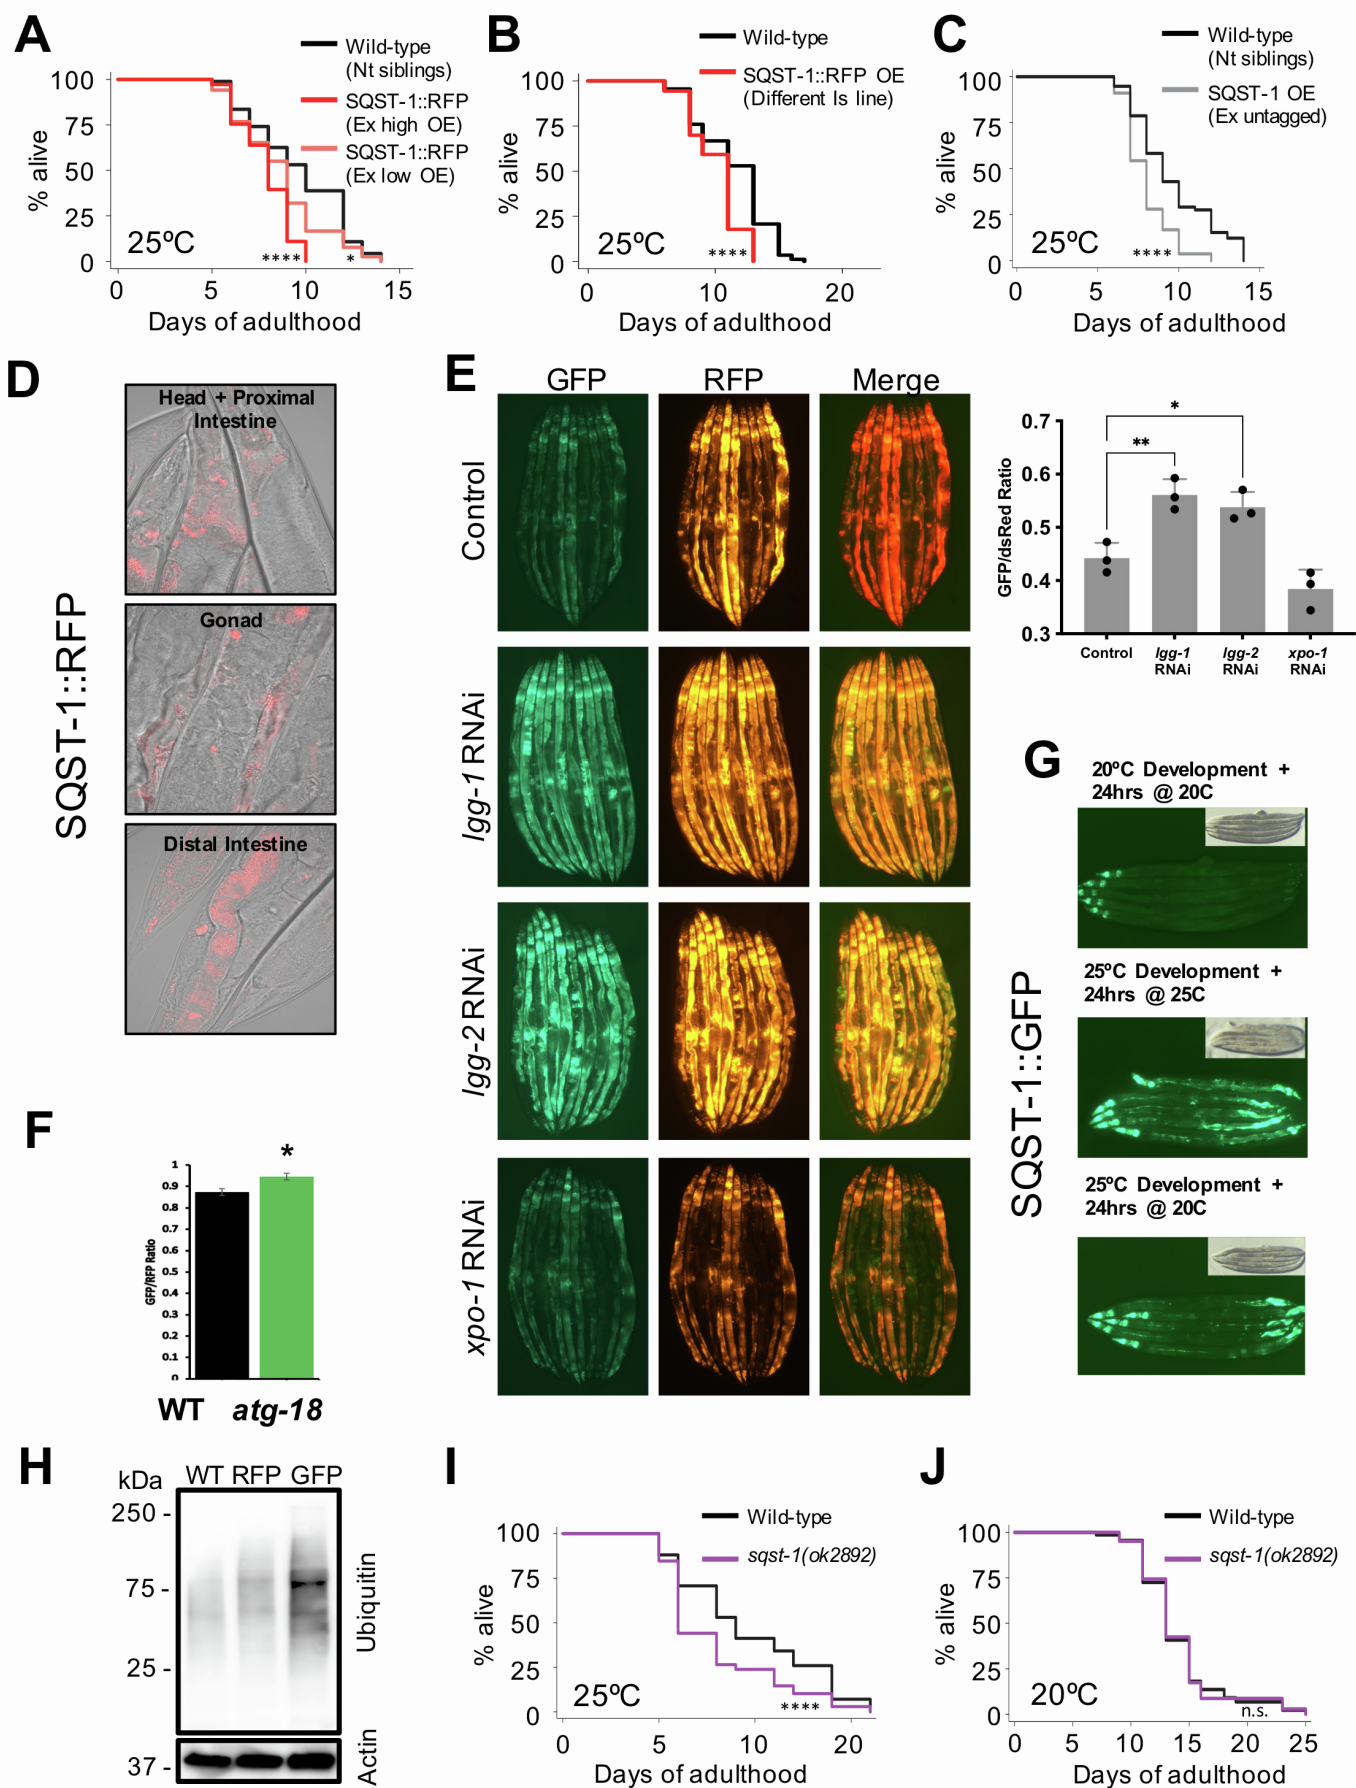

**Supplemental Figure 1. The function of SQST-1 in lifespan modulation is temperature-dependent, related to Figure 1.** **A.** Lifespan analysis of wild-type animals (non-transgenic siblings) and transgenic animals over-expressing SQST-1::RFP at low and high level (Ex: Extrachromosomal array), and **B.** transgenic animals over-expressing SQST-1::RFP (Integrated strain, Is) raised at 20°C and grown at 25°C during adulthood on OP50 *E. coli*. n=100. **C.** Lifespan analysis of wild-type animals (non-transgenic siblings, Nt) and transgenic animals over-expressing SQST-1 (untagged). **D.** Confocal images of SQST-1::RFP-expressing animals raised at 20°C and grown at 25°C for 5 days. **E.** Micrographs of animals expressing SQST-1::GFP::RFP after 72 hours of feeding during adulthood control bacteria or bacteria expressing dsRNA against autophagy genes *lgg-1* or *lgg-2*, or nuclear export protein and HLH-30 modulator *xpo-1*. **F.** Quantification of the GFP and RFP signal ratio in GFP::RFP::SQST-1 over-expressing animals in a wild-type or autophagy-defective *atg-18(gk378)* background. Average of 10 worms per image, n=3-4 images per condition *t-test* \* $p < 0.05$ , \*\* $p < 0.01$ . **G.** Images (GFP and transmitted light) of animals over-expressing SQST-1::GFP were raised at 20°C or 25°C and kept or transferred to 20°C, or kept at 25°C for 24 hours. **h.** Immunoblot of ubiquitin and actin in Day 1 wild-type (WT) animals and SQST-1::RFP (RFP) and SQST-1::GFP (GFP) over-expressing animals raised at 25°C. Lifespan analysis of wild-type animals and *sqst-1(ok2892)* animals raised at 20°C and grown at 25°C (**I**) or 20°C (**J**) during adulthood on OP50 *E. coli*. n=100. Details on lifespan analyses and repeats are available in Supplemental Table 3, Mantel-Cox log-rank. n.s.: not significant, \* $p < 0.05$ , \*\*\*\* $p < 0.001$ ,.

Supplemental Figure 2

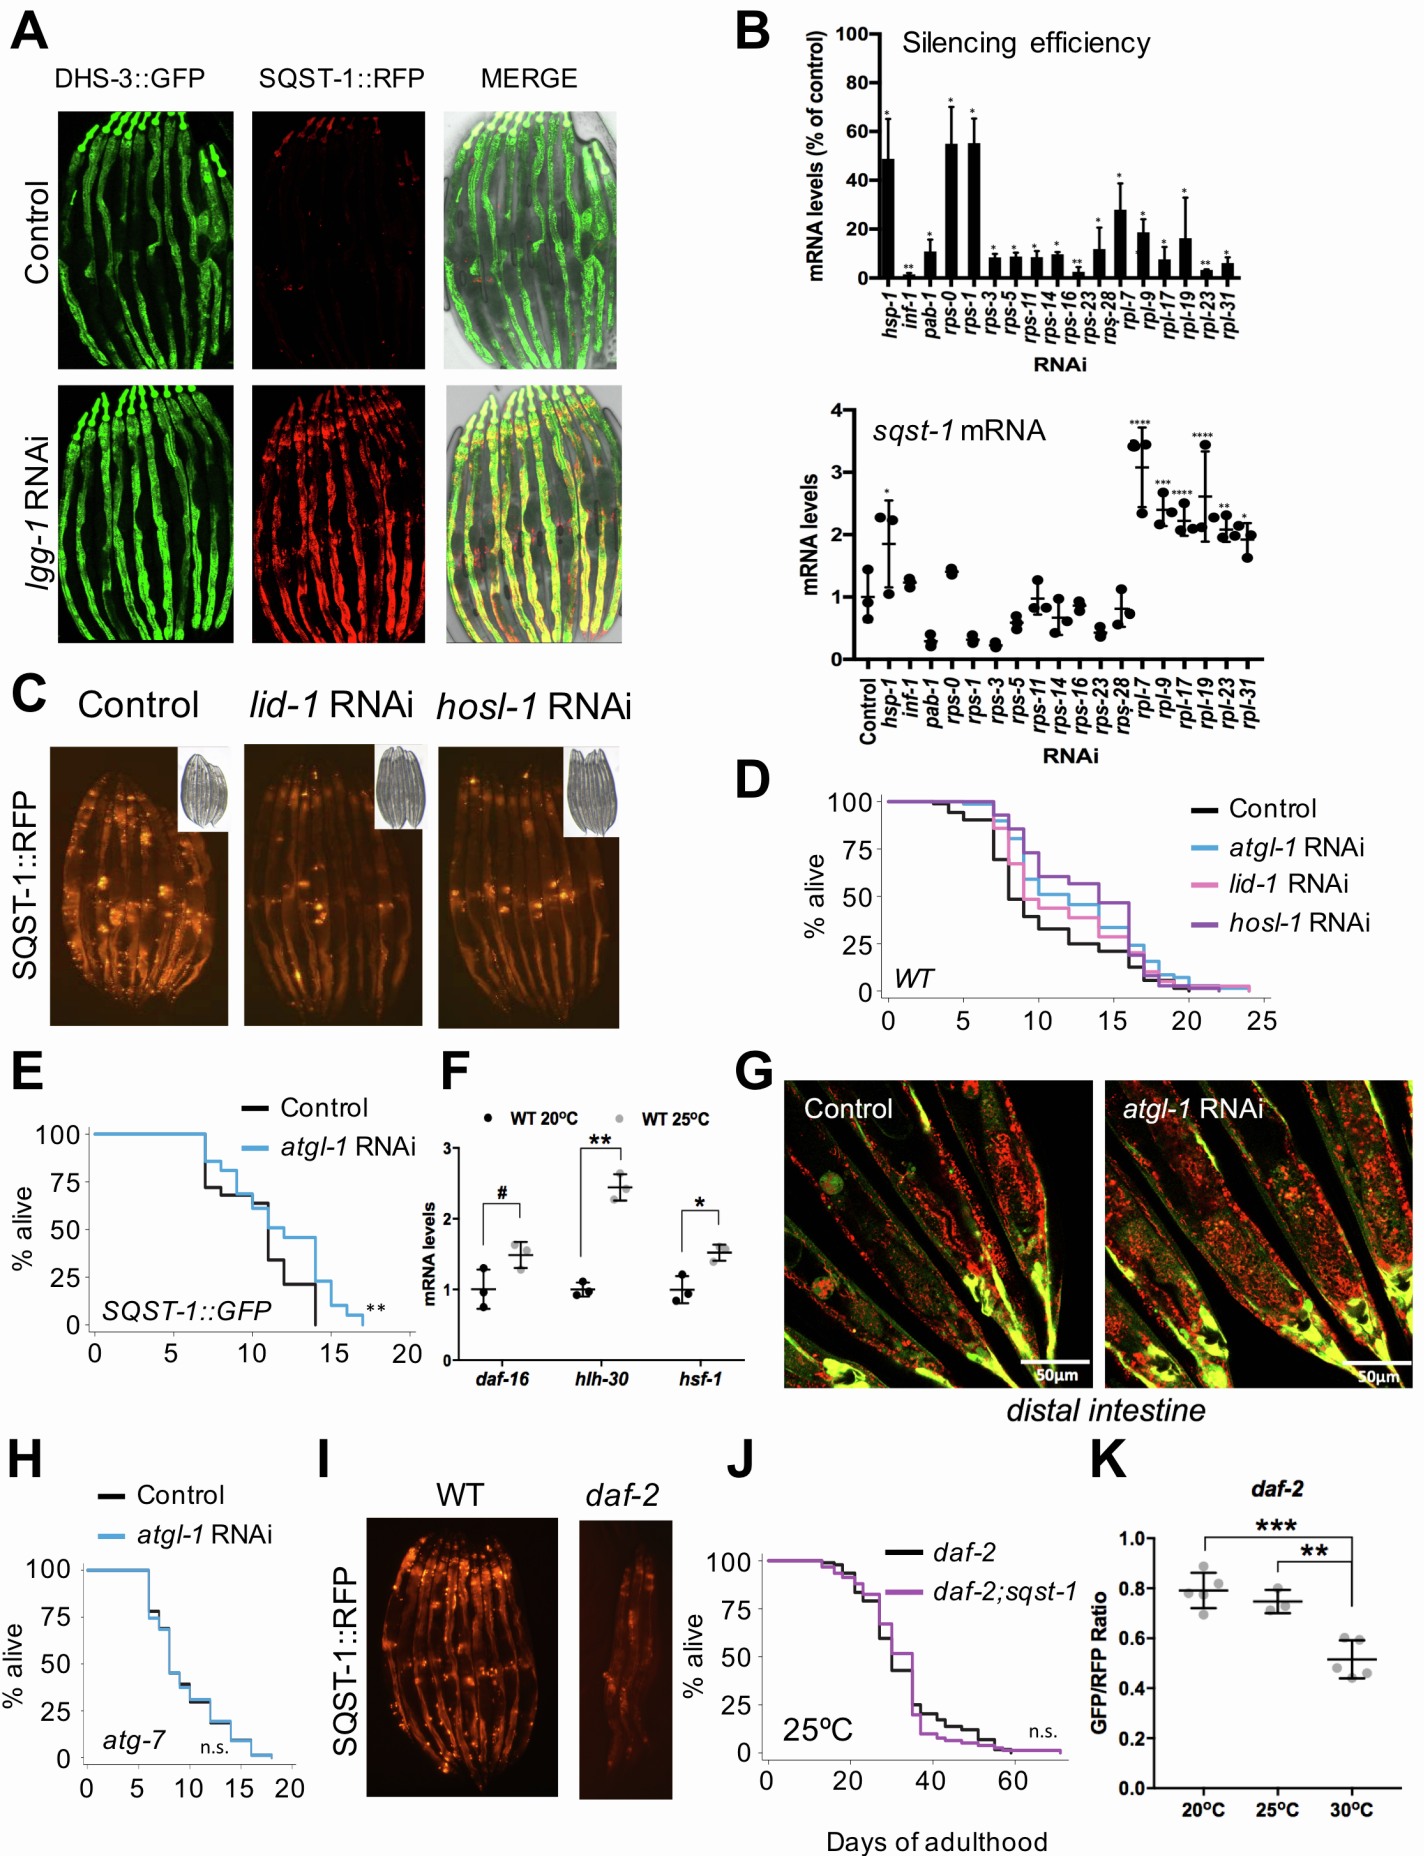



**Supplemental Figure 2. Lipid droplets enhance lifespan, autophagy, and the response to heat stress, related to Figures 2 and 3.** **A.** Image of whole animals expressing both SQST-1::RFP and the lipid droplet-resident protein DHS-3 fused to GFP, subjected to *lgg-1* silencing for 3 days during adulthood. **B.** qPCR analysis of gene silencing efficiency of each modifier and their corresponding levels of *sqst-1* mRNA after 4 days of silencing at 25°C during adulthood of animals expressing SQST-1::RFP. n=3,  $\pm$ SD, *t*-test (silencing efficiency) or ANOVA (*sqst-1* mRNA) \* $p$ <0.05, \*\* $p$ <0.01. **C.** Day 1 adult animals expressing SQST-1::RFP were fed control bacteria or bacteria expressing dsRNA against *lid-1* or *hosl-1* RNAi for 96 hours and were visualized by fluorescence microscopy. **D.** Lifespan analysis of wild-type animals raised on OP50 *E. coli* at 20°C and grown at 25°C on control bacteria or bacteria expressing dsRNA against *atgl-1*, *lid-1* or *hosl-1*. Brightfield image is seen in the insert. **E.** Lifespan analysis of transgenic animals over-expressing SQST-1::GFP raised on OP50 *E. coli* at 20°C and grown at 25°C on control bacteria or bacteria expressing dsRNA against *atgl-1*. **F.** qPCR analysis *daf-16*, *hlh-30* and *hsf-1* in Day 1 wild-type animals raised at 20°C or 25°C on OP50 *E. coli*. Biological triplicates *t*-test # $p$ =0.06, \* $p$ <0.05, \*\* $p$ <0.01 **G.** Representative confocal microscopy images of the distal intestine of animals expressing mCherry::GFP::LGG-1 and raised at 20°C and fed during adulthood control bacteria or bacteria expressing dsRNA against *atgl-1* for 2 days at 25°C. **H.** Lifespan analysis of *atg-7(bp411)* mutants raised on OP50 *E. coli* at 20°C and grown at 25°C on control bacteria or bacteria expressing dsRNA against *atgl-1*. **I.** Image of *daf-2(e1370)* animals over-expressing SQST-1::RFP raised on OP50 *E. coli*. bacteria at 20°C and transferred to 25°C during adulthood for 5 days. Comparative WT image in Figure 1A. **J.** Lifespan analysis of *daf-2(e1370)* and *daf-2(e1370);sqst-1(ok2892)* raised at 20°C and grown at 25°C during adulthood on OP50 *E. coli*. bacteria (n=100). **K.** Levels of GFP and RFP were measured in transgenic tandem *daf-2;SQST-1::GFP::RFP* animals after incubating Day 1 animals at 20°C, 25°C or 30°C for 24 hours on OP50 *E. coli*. Average of 10 worms per image. n=3-5 image per condition *t*-test \*\* $p$ <0.01, \*\*\* $p$ <0.001. Details on lifespan analyses and repeats are available in Supplemental Tables 3 and 4, Mantel-Cox log-rank. n.s.: not significant, \*\* $p$ <0.01.

# Supplemental Figure 3

## A

*atgl-1* RNAi WT DEG      *atgl-1* RNAi *daf-2* DEG

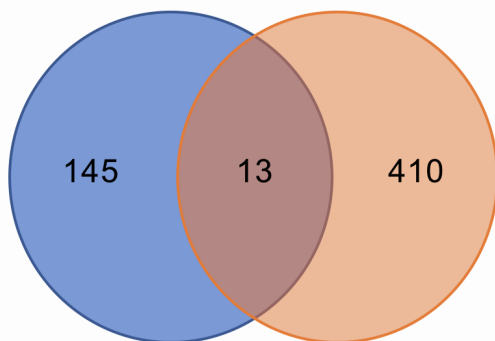

## C

ATGL-1 OE DEG      *atgl-1* RNAi DEG

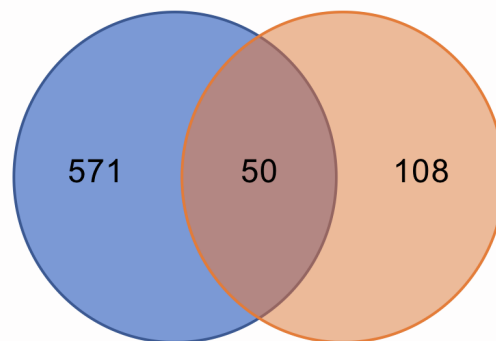

## B

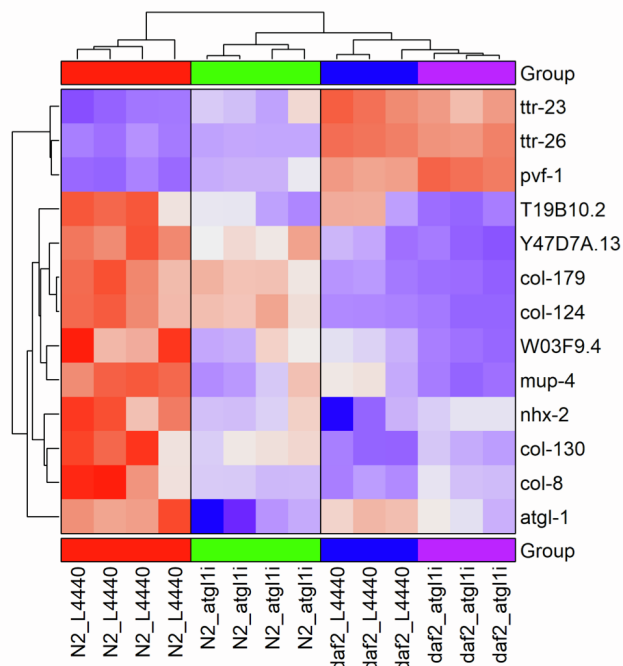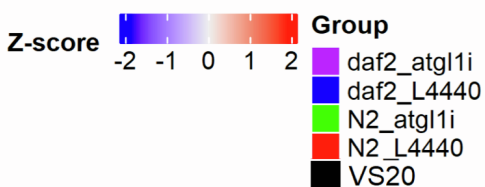

## D

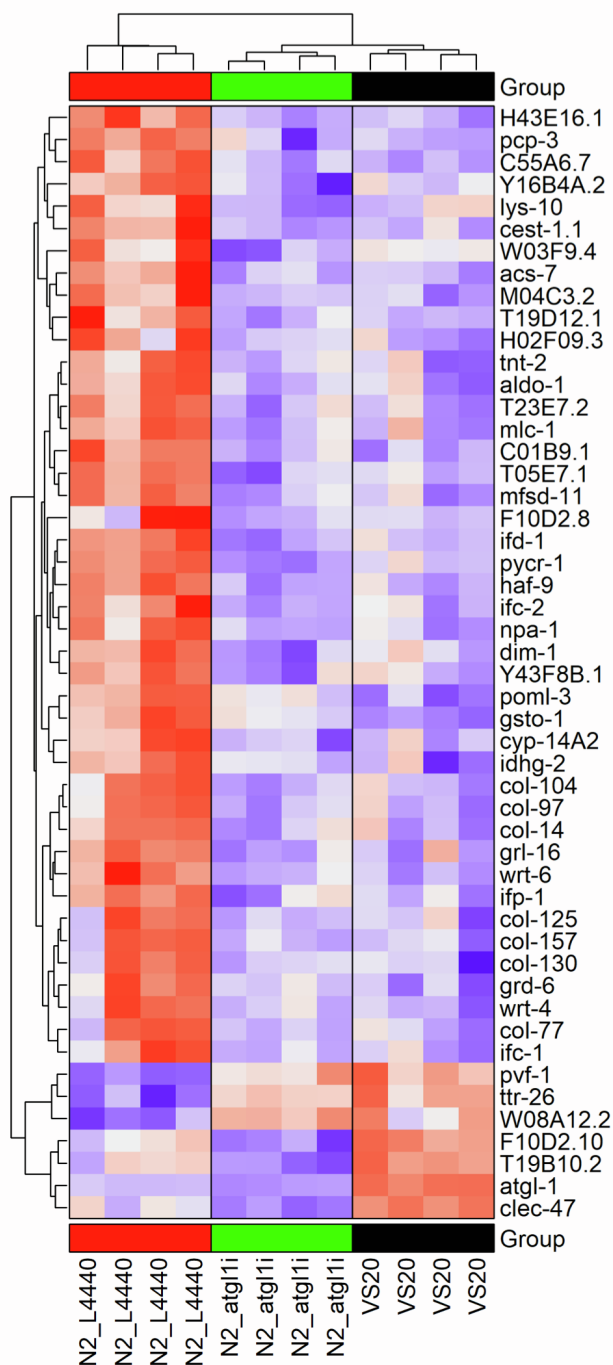

## E

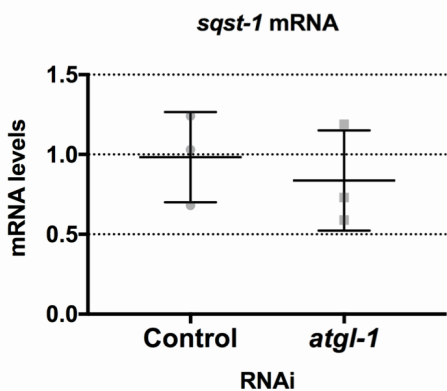

**Supplemental Figure 3. Transcriptomic analyses of animals with over-expressed or silenced *atgl-1* reveal limited transcriptional changes, related to Figure 3.**

**A.** Overlap of differentially expressed genes (DEGs) in WT and *daf-2* mutant backgrounds when *atgl-1* is silenced during adulthood at 25°C for 4 days. **B.** Identity of overlapping DEGs from a. and their regulation status in each strain. **C.** Overlap of DEGs between nematodes over-expressing ATGL-1::GFP and adult-only *atgl-1* silencing in wild-type animals at 25°C for 4 days. **D.** Identity of overlapping DEGs from c. and their regulation status under each condition. Heatmaps were created using Rstudio. **E.** qPCR analysis of *sqst-1* mRNA in wild-type animals fed during adulthood control bacteria or bacteria expressing dsRNA against *atgl-1* for 4 days at 25°C. n=3 ±SD *t*-test.

# Supplemental Figure 4

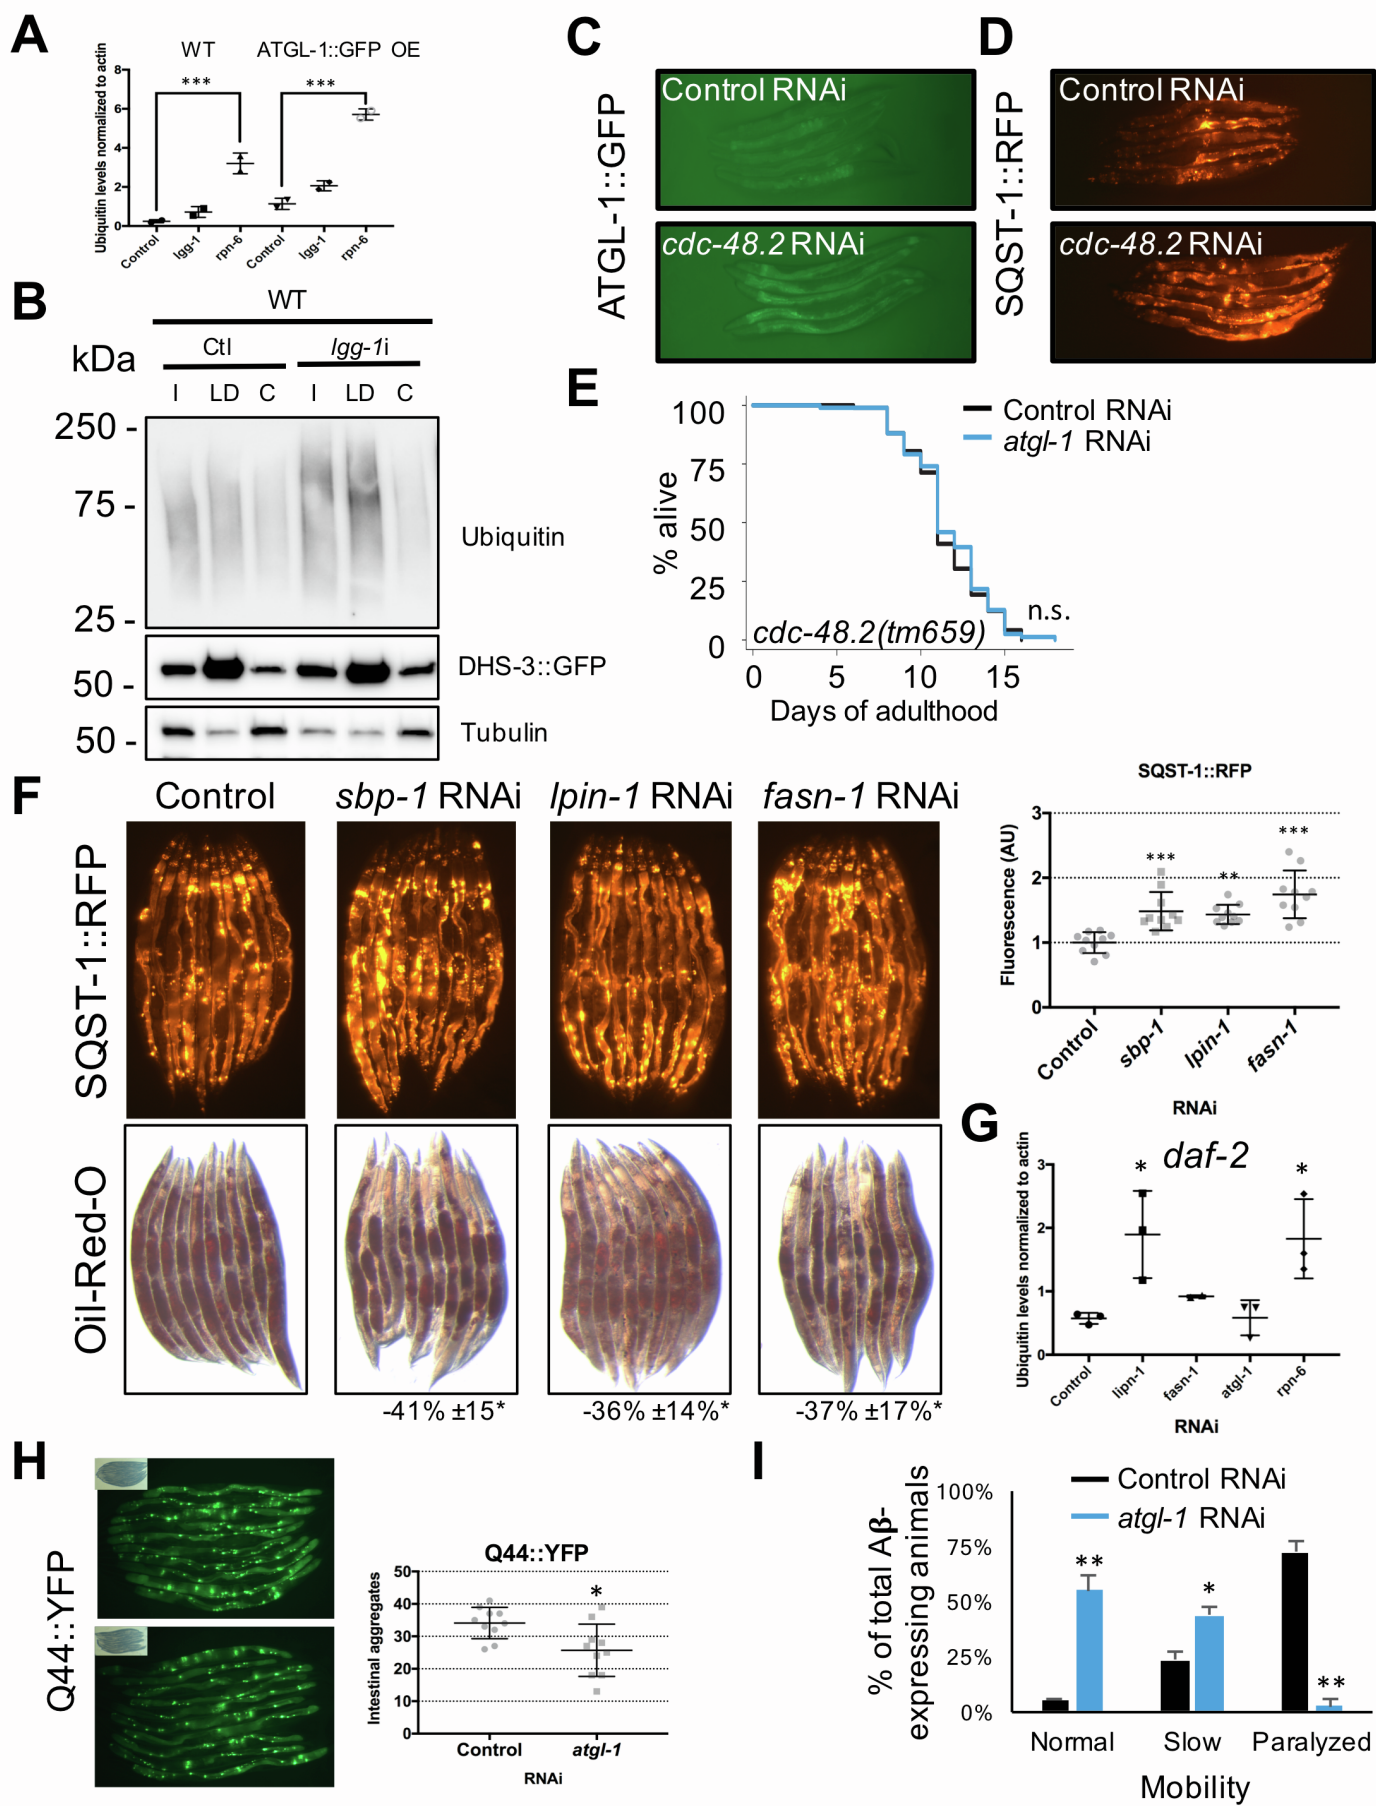



**Supplemental Figure 4. Roles of lipid droplet levels in protein ubiquitination, SQST-1 dynamics and protein aggregation, related to Figure 4.** **A.** Quantification of polyubiquitinated proteins in Figure 4C. **B.** Animals expressing lipid droplet-resident protein DHS-3 fused to GFP were raised at 20°C and then grown at 25°C during adulthood on control bacteria or bacteria expressing RNAi against *Igg-1* for 4 days. Levels of ubiquitinated proteins, DHS-3::GFP and cytosolic marker tubulin were immunoblotted from total input (I), cytosol (C) and lipid droplet (LD) fractions (fractions loaded comparatively, i.e. 10%). **C.** Day 1 ATGL-1::GFP and **D.** SQST-1::RFP over-expressing nematodes were fed control bacteria or bacteria expressing dsRNA against *cdc-48.2* for 2 days at 25°C. **E.** Lifespan analysis of *cdc-48.2* mutants fed control bacteria or bacteria expressing dsRNA against *atgl-1* during adulthood at 25°C. **F.** Day 1 SQST-1::RFP over-expressing nematodes were fed control bacteria or bacteria expressing dsRNA against *sbp-1*, *lpin-1*, or *fasn-1* for 6 days at 25°C. Corresponding images of nematodes stained with Oil-Red-O. Fluorescence was quantified using Image J.  $\pm$ SD ANOVA  $*p < 0.05$ ,  $****p < 0.001$ . **G.** Quantification of polyubiquitinated protein levels in Figure 4G. **H.** Nematodes expressing intestinally Q44::YFP were grown at 20°C on OP50 *E. coli* and fed control bacteria or bacteria expressing dsRNA against *atgl-1* at Day 1 of adulthood for 4 days at 25°C, followed by quantification of intestinal aggregates.  $\pm$ SD *t*-test  $*p < 0.05$ . **I.** Nematodes expressing heat-inducible human A $\beta$ -42 were grown at 20°C on OP50 *E. coli* and fed control bacteria or bacteria expressing dsRNA against *atgl-1* at Day 1 of adulthood for 2 days at 25°C. Paralysis was scored thereafter. Triplicates of  $n=100$  each,  $\pm$ SD *t*-test  $*p < 0.05$ ,  $**p < 0.01$ . Details on lifespan analyses and repeats are available in Supplemental Table 4, Mantel-Cox log-rank. n.s.: not significant.

## Supplemental Table 1

**See Supplemental Table 1 Excel File**

## Supplemental Table 2

**See Supplemental Table 2 Excel File**

Supplemental Table 3

| Strains                                                                                   | Transgenic Mean Lifespan | Events Observed | N2 Control Mean Lifespan | Events Observed | % Difference | P Value | Fig. |
|-------------------------------------------------------------------------------------------|--------------------------|-----------------|--------------------------|-----------------|--------------|---------|------|
| <b>25°C</b>                                                                               |                          |                 |                          |                 |              |         |      |
| LRL160 ( <i>Ilcls12 (sqst-1p::sqst-1::RFP::unc-54 + myo-2p::GFP)</i> )                    | 11.9                     | 43/100          | 13.5                     | 50/100          | -11%         | 0.0661  |      |
| LRL160 ( <i>Ilcls12 (sqst-1p::sqst-1::RFP::unc-54 + myo-2p::GFP)</i> )                    | 10.5                     | 76/100          | 11.5                     | 87/100          | -9%          | 0.0094  |      |
| LRL160 ( <i>Ilcls12 (sqst-1p::sqst-1::RFP::unc-54 + myo-2p::GFP)</i> )                    | 9.8                      | 57/100          | 12.9                     | 49/100          | -24%         | <0.0001 | 1A   |
| LRL161 ( <i>Ilcls13 (sqst-1p::sqst-1::RFP::unc-54 + myo-2p::GFP)</i> )                    | 10.1                     | 84/100          | 11.5                     | 87/100          | -12%         | <0.0001 | S1B  |
| MAH349( <i>sqIs35[pMH951/SQST::GFP/p62::GF P+pMH876/unc-122p::rfp]</i> )                  | 7.7                      | 50/100          | 9.9                      | 53/100          | -22%         | <0.0001 |      |
| MAH349( <i>sqIs35[pMH951/SQST::GFP/p62::GF P+pMH876/unc-122p::rfp]</i> )                  | 7.9                      | 48/100          | 10.0                     | 86/100          | -21%         | <0.0001 |      |
| MAH349( <i>sqIs35[pMH951/SQST::GFP/p62::GF P+pMH876/unc-122p::rfp]</i> )                  | 7.9                      | 58/100          | 10.6                     | 71/100          | -26%         | <0.0001 | 1B   |
| MAH349( <i>sqIs35[pMH951/SQST::GFP/p62::GF P+pMH876/unc-122p::rfp]</i> )                  | 9.6                      | 28/100          | 11.0                     | 48/100          | -13%         | 0.0320  |      |
| LRL132 ( <i>IlcEx55 (sqst-1p::sqst-1::GFP::RFP::unc-54)</i> )                             | 10.7                     | 89/100          | 11.7                     | 74/100          | -9%          | 0.0017  | 1B   |
| LRL132 ( <i>IlcEx55 (sqst-1p::sqst-1::GFP::RFP::unc-54)</i> )                             | 10.0                     | 89/100          | 10.9                     | 70/100          | -8%          | 0.0030  |      |
| LRL90( <i>IlcEx39 (sqst-1p::sqst-1::RFP::unc-54 + myo-2p::GFP)</i> ) <i>Ex high</i>       | 7.9                      | 124/160         | 9.6                      | 57/100          | -18%         | <0.0001 | S1A  |
| LRL90( <i>IlcEx39 (sqst-1p::sqst-1::RFP::unc-54 + myo-2p::GFP)</i> ) <i>Ex low</i>        | 8.6                      | 79/100          | 9.6                      | 57/100          | -11%         | 0.0250  | S1A  |
| LRL90( <i>IlcEx39 (sqst-1p::sqst-1::RFP::unc-54 + myo-2p::GFP)</i> ) <i>Ex high</i>       | 9.8                      | 87/100          | 11.2                     | 75/100          | -13%         | 0.0061  |      |
| LRL90( <i>IlcEx39 (sqst-1p::sqst-1::RFP::unc-54 + myo-2p::GFP)</i> ) <i>Ex low</i>        | 9.5                      | 69/100          | 11.2                     | 75/100          | -15%         | 0.0021  |      |
| MAH844 ( <i>Exsq146 (sqst-1p::sqst-1 + rol-6)</i> )                                       | 8.0                      | 61/100          | 9.6                      | 68/100          | -16%         | <0.0001 | S1C  |
| VC2196 ( <i>sqst-1 (ok2892) IV</i> )                                                      | 7.5                      | 87/100          | 9.9                      | 53/100          | -24%         | <0.0001 |      |
| VC2196 ( <i>sqst-1 (ok2892) IV</i> )                                                      | 7.9                      | 81/100          | 10.0                     | 86/100          | -21%         | <0.0001 | S1I  |
| VC2196 ( <i>sqst-1 (ok2892) IV</i> )                                                      | 9.3                      | 75/100          | 10.6                     | 71/100          | -12%         | 0.0420  |      |
| VC2196 ( <i>sqst-1 (ok2892) IV</i> )                                                      | 9.5                      | 63/100          | 11.0                     | 48/100          | -14%         | 0.0023  |      |
| VS20 ( <i>hJIs67 [atgl-1p::atgl-1::GFP + mec-7::RFP]</i> )                                | 11.8                     | 74/100          | 13.5                     | 50/100          | -12%         | 0.0203  | 4A   |
| VS20 ( <i>hJIs67 [atgl-1p::atgl-1::GFP + mec-7::RFP]</i> )                                | 10.1                     | 59/100          | 10.7                     | 79/100          | -6%          | 0.0312  |      |
| VS20 ( <i>hJIs67 [atgl-1p::atgl-1::GFP + mec-7::RFP]</i> )                                | 11.6                     | 61/100          | 12.9                     | 49/100          | -10%         | 0.0035  |      |
| LRL24 ( <i>daf-2(e1370) III; sqIs35[pMH951/SQST::GFP/p62::GFP+pMH876/unc-122p::rfp]</i> ) | 30.7                     | 95/100          | 27.9 ( <i>daf-2</i> )    | 95/100          | 10%          | 0.1258  |      |
| LRL24 ( <i>daf-2(e1370) III; sqIs35[pMH951/SQST::GFP/p62::GFP+pMH876/unc-122p::rfp]</i> ) | 31.9                     | 92/100          | 29.3 ( <i>daf-2</i> )    | 89/100          | 9%           | 0.5998  | 3J   |
| LRL170 ( <i>daf-2(e1370) III; sqst-1 (ok2892) IV</i> )                                    | 32.0                     | 89/100          | 32.5 ( <i>daf-2</i> )    | 80/100          | -2%          | 0.8749  | S2E  |
| <b>20°C</b>                                                                               |                          |                 |                          |                 |              |         |      |
| LRL160 ( <i>Ilcls12 (sqst-1p::sqst-1::RFP::unc-54 + myo-2p::GFP)</i> )                    | 14.0                     | 62/100          | 15.1                     | 68/100          | -7%          | 0.1021  | 1D   |
| LRL160 ( <i>Ilcls12 (sqst-1p::sqst-1::RFP::unc-54 + myo-2p::GFP)</i> )                    | 15.3                     | 48/100          | 16.3                     | 50/100          | -6%          | 0.2725  |      |
| LRL161 ( <i>Ilcls13 (sqst-1p::sqst-1::RFP::unc-54 + myo-2p::GFP)</i> )                    | 14.0                     | 63/100          | 15.1                     | 68/100          | -7%          | 0.0904  |      |
| MAH349( <i>sqIs35[pMH951/SQST::GFP/p62::GF P+pMH876/unc-122p::rfp]</i> )                  | 14.1                     | 42/100          | 14.0                     | 49/100          | 1%           | 0.6271  | 1D   |
| MAH349( <i>sqIs35[pMH951/SQST::GFP/p62::GF P+pMH876/unc-122p::rfp]</i> )                  | 15.3                     | 48/100          | 14.2                     | 30/100          | 7%           | 0.3137  |      |
| LRL132 ( <i>IlcEx55 (sqst-1p::sqst-1::GFP::RFP::unc-54)</i> )                             | 14.1                     | 68/100          | 15.0                     | 42/100          | -6%          | 0.1409  | 1F   |
| VC2196 ( <i>sqst-1 (ok2892) IV</i> )                                                      | 14.1                     | 52/100          | 14.0                     | 49/100          | 1%           | 0.8730  | S1J  |
| VS20 ( <i>hJIs67 [atgl-1p::atgl-1::GFP + mec-7::RFP]</i> )                                | 15.2                     | 77/100          | 11.9                     | 58/100          | 27%          | <0.0001 |      |

**Supplemental Table 3. Lifespan analyses performed on OP50 *E. coli*.** Animals were raised at 20°C and grown at 20°C or 25°C (as noted) during adulthood on OP50 *E. coli*. Mantel-Cox log-rank.



Supplemental Table 4

| Strains                                                                | <i>atgl-1</i> RNAi<br>Mean<br>Lifespan | Events<br>Observed | Control RNAi<br>Mean<br>Lifespan | Events<br>Observed | % Difference | P Value | Fig. |
|------------------------------------------------------------------------|----------------------------------------|--------------------|----------------------------------|--------------------|--------------|---------|------|
| N2                                                                     | 16.0                                   | 59/100             | 13.1                             | 53/100             | 22%          | 0.0017  | 3A   |
| N2                                                                     | 11.9                                   | 75/100             | 10.4                             | 79/100             | 14%          | 0.0019  |      |
| N2                                                                     | 12.6                                   | 90/100             | 10.6                             | 79/100             | 19%          | <0.0001 |      |
| N2                                                                     | 12.7                                   | 66/100             | 9.9                              | 50/100             | 28%          | <0.0001 |      |
| N2                                                                     | 11.4                                   | 52/100             | 10.2                             | 60/100             | 12%          | 0.0461  |      |
| N2                                                                     | 11.5                                   | 64/100             | 10.1                             | 72/100             | 14%          | 0.0009  |      |
| N2                                                                     | 11.8                                   | 57/100             | 9.9                              | 67/100             | 19%          | 0.0001  |      |
| N2                                                                     | 13.1                                   | 75/100             | 11.1                             | 53/100             | 18%          | 0.0231  |      |
| N2                                                                     | 12.7                                   | 62/100             | 10.5                             | 61/100             | 21%          | <0.0001 |      |
| N2                                                                     | 12.8                                   | 55/100             | 11.7                             | 65/100             | 9%           | 0.0468  |      |
| N2                                                                     | 11.3                                   | 66/100             | 9.1                              | 85/100             | 24%          | 0.0003  |      |
| N2                                                                     | 12.5                                   | 74/100             | 10.1                             | 76/100             | 24%          | 0.0013  | S2D  |
| CF1037 ( <i>daf-16 (mu86) I</i> )                                      | 14.0                                   | 55/100             | 11.6                             | 53/100             | 21% (22)     | 0.0010  | 3E   |
| CF1037 ( <i>daf-16 (mu86) I</i> )                                      | 10.1                                   | 83/100             | 9.0                              | 81/100             | 12% (14)     | 0.0002  |      |
| LRL31 ( <i>hlh-30 (tm1978) IV</i> )                                    | 14.7                                   | 72/100             | 12.1                             | 62/100             | 22% (22)     | <0.0001 | 3F   |
| LRL31 ( <i>hlh-30 (tm1978) IV</i> )                                    | 8.7                                    | 59/100             | 7.9                              | 77/100             | 10% (14)     | <0.0001 |      |
| CF2495 ( <i>hsf-1 (sy441) I</i> )                                      | 12.4                                   | 36/100             | 11.9                             | 35/100             | 4% (22)      | 0.5855  | 3G   |
| CF2495 ( <i>hsf-1 (sy441) I</i> )                                      | 10.7                                   | 86/100             | 10.2                             | 85/100             | 5% (14)      | 0.3276  |      |
| MAH349 ( <i>sqls35[sqst-1p::sqst-1::GFP + unc-122p::rfp]</i> )         | 11.8                                   | 40/100             | 9.8                              | 44/100             | 20%(19)      | 0.0010  | S2D  |
| LRL160 ( <i>llcls12 (sqst-1p::sqst-1::RFP::unc-54 + myo-2p::GFP)</i> ) | 12.1                                   | 73/100             | 8.6                              | 69/100             | 41% (19)     | <0.0001 | 3C   |
| HZ1686 ( <i>atg-7 bp411 IV</i> )                                       | 9.5                                    | 85/100             | 9.5                              | 82/100             | 0%(14)       | 0.9579  | S2G  |
| HZ1686 ( <i>atg-7 bp411 IV</i> )                                       | 9.0                                    | 73/100             | 9.3                              | 58/100             | -3% (19)     | 0.5323  |      |
| CF1041 ( <i>daf-2 e1370 III</i> )                                      | 35.0                                   | 80/100             | 27.3                             | 76/100             | 28% (18)     | <0.0001 | 3J   |
| CF1041 ( <i>daf-2 e1370 III</i> )                                      | 25.1                                   | 60/100             | 23.0                             | 81/100             | 9% (18)      | 0.0312  |      |
| FX544 ( <i>cdc-48.1 (tm544) II</i> )                                   | 12.4                                   | 79/100             | 12.3                             | 77/100             | -1% (21)     | 0.7901  |      |
| FX659 ( <i>cdc-48.2 (tm659) II</i> )                                   | 9.4                                    | 47/100             | 9.5                              | 54/100             | 1% (12)      | 0.8290  | S4D  |
| FX659 ( <i>cdc-48.2 (tm659) II</i> )                                   | 11.6                                   | 79/100             | 11.5                             | 76/100             | 1% (21)      | 0.5981  |      |
| Strains                                                                | <i>lid-1</i> RNAi<br>Mean<br>Lifespan  | Events<br>Observed | Control RNAi<br>Mean<br>Lifespan | Events<br>Observed | % Difference | P value |      |
| N2                                                                     | 10.8                                   | 62/100             | 9.1                              | 85/100             | 19%          | 0.0080  |      |
| N2                                                                     | 11.7                                   | 60/100             | 10.1                             | 76/100             | 16%          | 0.0510  | S2D  |
| Strains                                                                | <i>hosl-1</i> RNAi<br>Mean<br>Lifespan | Events<br>Observed | Control RNAi<br>Mean<br>Lifespan | Events<br>Observed | % Difference | P value |      |
| N2                                                                     | 12.3                                   | 69/100             | 9.1                              | 85/100             | 35%          | <0.0001 |      |
| N2                                                                     | 13.1                                   | 79/100             | 10.1                             | 76/100             | 30%          | 0.0003  | S2D  |
| Strains                                                                | <i>lipn-1</i> RNAi<br>Mean<br>Lifespan | Events<br>Observed | Control RNAi<br>Mean<br>Lifespan | Events<br>Observed | % Difference | P value |      |
| N2                                                                     | 11.4                                   | 79/100             | 12.1                             | 74/100             | -6%          | 0.0982  |      |
| N2                                                                     | 10.2                                   | 78/100             | 11.1                             | 80/100             | -8%          | 0.0475  | 4H   |
| CF1041 ( <i>daf-2 e1370 III</i> )                                      | 26.1                                   | 89/100             | 32.3                             | 56/100             | -19%         | 0.0003  |      |
| CF1041 ( <i>daf-2 e1370 III</i> )                                      | 26.4                                   | 88/100             | 33.4                             | 57/100             | -21%         | <0.0001 | 4H   |
| Strains                                                                | <i>fasn-1</i> RNAi<br>Mean<br>Lifespan | Events<br>Observed | Control RNAi<br>Mean<br>Lifespan | Events<br>Observed | % Difference | P value |      |
| N2                                                                     | 10.1                                   | 82/100             | 12.1                             | 74/100             | -16%         | 0.0001  |      |
| N2                                                                     | 10.1                                   | 69/100             | 11.1                             | 80/100             | -9%          | 0.0171  |      |
| CF1041 ( <i>daf-2 e1370 III</i> )                                      | 26.1                                   | 77/100             | 32.3                             | 56/100             | -19%         | 0.0006  |      |
| CF1041 ( <i>daf-2 e1370 III</i> )                                      | 29.4                                   | 83/100             | 33.4                             | 57/100             | -12%         | 0.0020  |      |

**Supplemental Table 4. Lifespan analyses related to gene silencing.** Animals were developed at 20°C on OP50 and transferred on control bacteria or bacteria expressing dsRNA against *atg-1* and grown at 25°C during adulthood. Comparable N2 % difference in brackets. Mantel-Cox log-rank.

## Supplemental Table 5

| Published strains used in this study: |                                                                                    |                                                                                              |
|---------------------------------------|------------------------------------------------------------------------------------|----------------------------------------------------------------------------------------------|
| Strain                                | Genotype                                                                           | Strain origin                                                                                |
| N2                                    | Wild-type, WT                                                                      | Hansen Lab                                                                                   |
| CF1037                                | <i>daf-16 (mu86) I</i>                                                             | Hansen Lab                                                                                   |
| CF1041                                | <i>daf-2(e1370) III</i>                                                            | Hansen Lab                                                                                   |
| CF2495                                | <i>hsf-1(sy441) I</i>                                                              | Hansen Lab                                                                                   |
| FX544                                 | <i>cdc-48.1(tm544) II</i>                                                          | CGC, National Bioresource Project at the Tokyo Women's Medical University School of Medicine |
| FX659                                 | <i>cdc-48.2(tm659) II</i>                                                          | CGC, National Bioresource Project at the Tokyo Women's Medical University School of Medicine |
| FX1978                                | <i>hlh-30 (tm1978) IV</i>                                                          | CGC, National Bioresource Project at the Tokyo Women's Medical University School of Medicine |
| GF80                                  | dgEx80 [(pAMS66) <i>vha-6p::Q44::YFP</i> + <i>rol-6(su1006)</i> + pBluescript II]. | CGC                                                                                          |
| GMC101                                | <i>dvIs100 [unc-54p::A-beta-1-42::unc-54 3'-UTR</i> + <i>mtl-2p::GFP]</i>          | CGC                                                                                          |
| LIU1                                  | <i>Idrls1 (dhs-3p::dhs-3::GFP</i> + <i>unc-76(+)</i> )                             | CGC                                                                                          |
| LRL9                                  | <i>atg-7 (bp411) IV</i>                                                            | Lapierre Lab                                                                                 |
| MAH78                                 | <i>sqIs2[PlipI-4::LIPL-4(K04A8.5)::SL2gfp</i> + <i>Pmyo-2::CHERRY]</i>             | Hansen Lab                                                                                   |
| MAH215                                | <i>sqIs15[lgg-1p::mCherry::GFP::lgg-1</i> + <i>rol-6]</i>                          | Hansen Lab                                                                                   |
| MAH349                                | <i>sqIs35[sqst-1p::sqst-1::GFP</i> + <i>unc-122p::rfp]</i>                         | Hansen Lab                                                                                   |
| MAH844                                | <i>sqEx146[sqst-1p::sqst-1</i> + <i>rol-6]</i>                                     | CGC                                                                                          |
| VC2196                                | <i>sqst-1 (ok2892) IV</i>                                                          | CGC                                                                                          |
| VS20                                  | <i>hJIs67 [atgl-1p::atgl-1::GFP</i> + <i>mec-7::RFP]</i>                           | CGC                                                                                          |

**Supplemental Table 5. Published strains used in the study**

## Supplemental Table 6

| New strains created for this study: |                                                                                                         |                                                                                                                                                                                                                                                                                                                                                                                                                                                                                                                                                                                                                                                                                                                                                                                                                                                                                                                                                                                                                                                                                                                                           |
|-------------------------------------|---------------------------------------------------------------------------------------------------------|-------------------------------------------------------------------------------------------------------------------------------------------------------------------------------------------------------------------------------------------------------------------------------------------------------------------------------------------------------------------------------------------------------------------------------------------------------------------------------------------------------------------------------------------------------------------------------------------------------------------------------------------------------------------------------------------------------------------------------------------------------------------------------------------------------------------------------------------------------------------------------------------------------------------------------------------------------------------------------------------------------------------------------------------------------------------------------------------------------------------------------------------|
| Strain                              | Genotype                                                                                                | Comments                                                                                                                                                                                                                                                                                                                                                                                                                                                                                                                                                                                                                                                                                                                                                                                                                                                                                                                                                                                                                                                                                                                                  |
| LRL24                               | <i>daf-2(e1370) III; sqIs35[pMH951/SQST::GFP/p62::GFP+pMH876/unc-122p::rfp]</i>                         | CF1041 x MAH349                                                                                                                                                                                                                                                                                                                                                                                                                                                                                                                                                                                                                                                                                                                                                                                                                                                                                                                                                                                                                                                                                                                           |
| LRL31                               | <i>hlh-30 (tm1978) IV</i>                                                                               | FX1978 4x backcrossed to N2                                                                                                                                                                                                                                                                                                                                                                                                                                                                                                                                                                                                                                                                                                                                                                                                                                                                                                                                                                                                                                                                                                               |
| LRL90                               | <i>llcEx39 (sqst-1p::sqst-1::RFP::unc-54 + myo-2p::GFP)</i>                                             | Injected N2 with 20 ng/uL pLAP26 and 5 ng/uL pLP7. pLP7 ( <i>myo-2p::GFP::unc-54</i> ) was obtained from Addgene (pBCN27). pLAP26 ( <i>sqst-1p::sqst-1::RFP::unc-54</i> ) was generated by NEBuilder® HiFi DNA Assembly Cloning Kit (New England BioLabs Inc., Ipswich, MA) by replacing the 3XFLAG-tag with the <i>RFP</i> sequence in pLP25 ( <i>sqst-1p::sqst-1::3XFLAG::unc-54</i> ) (unpublished). The <i>RFP</i> insert was PCR-amplified from Addgene plasmid #8938 ( <i>unc-122p::RFP</i> ) with HiFi-compatible forward primer LC209 (5' GATGTGCTTCAGGCGCTTCTTCACGGCTCGGGCTCGATGGTGCGCTCCTCCAAGAACG 3') and reverse primer LC210 (5' GACACCAGACAAGTTGGTAATGGCTACAGGAACAGGTGGTGGC 3'). For linearizing and amplifying linear fragments of the vector backbone <i>sqst-1p::sqst-1::unc-54</i> from pLAP25, HiFi-compatible forward primer LC207 (5' CCATTACCAACTTGTCTGGTGTC 3') and reverse primer LC208 (5' GTGAAGAAGCGCCTGAAGACACATC 3') were used. Ligation of insert to the vector backbone and subsequent transformation of products into competent <i>E. coli</i> , were performed according to manufacturer's instructions. |
| LRL132                              | <i>llcEx55 (sqst-1p::sqst-1::GFP::RFP::unc-54)</i>                                                      | Injected N2 with 20 ng/uL pLAP29 ( <i>sqst-1p::sqst-1::GFP::RFP::unc-54</i> ). pLAP29 was generated by NEBuilder® HiFi DNA Assembly Cloning Kit (New England BioLabs Inc., Ipswich, MA) by inserting the <i>GFP</i> sequence 3' and 5' of the <i>sqst-1</i> and <i>RFP</i> sequences in pLAP26 ( <i>sqst-1p::sqst-1::RFP::unc-54</i> ) respectively. The <i>GFP</i> insert was PCR-amplified from plasmid #836 kindly provided by Dr Andrew Dillin (UC Berkeley) with HiFi-compatible forward primer LC251 (5' TTCAGGCGCTTCTTCACGGCTCGGGCTCGATGAGTAAGGAGAAGAACATTTTC 3') and reverse primer LC252 (5' GACGTTCTTGGAGGAGCGCACCATCGAGCCGCCGCCCTTTGTATAGTTCATCCATGC CATG 3'). For linearizing and amplifying the vector backbone pLP26, HiFi-compatible forward primer LC244 (5' GATGGTGGCTCCTCCAAGAAGCTC 3') and reverse primer LC250 (5' GCCGTGAAGAAGCGCCTGAAGACAC 3') were used. Ligation of insert to the vector backbone and subsequent transformation of products into competent <i>E. coli</i> , were performed according to manufacturer's instructions.                                                                              |
| LRL160                              | <i>llcls12 (sqst-1p::sqst-1::RFP::unc-54 + myo-2p::GFP)</i>                                             | UV irradiation of LRL90, 6x backcrossed to N2                                                                                                                                                                                                                                                                                                                                                                                                                                                                                                                                                                                                                                                                                                                                                                                                                                                                                                                                                                                                                                                                                             |
| LRL161                              | <i>llcls13 (sqst-1p::sqst-1::RFP::unc-54 + myo-2p::GFP)</i>                                             | UV irradiation of LRL90, 6x backcrossed to N2                                                                                                                                                                                                                                                                                                                                                                                                                                                                                                                                                                                                                                                                                                                                                                                                                                                                                                                                                                                                                                                                                             |
| LRL170                              | <i>daf-2(e1370) III; sqst-1 (ok2892) IV</i>                                                             | CF1041 x VC2196                                                                                                                                                                                                                                                                                                                                                                                                                                                                                                                                                                                                                                                                                                                                                                                                                                                                                                                                                                                                                                                                                                                           |
| LRL171                              | <i>daf-2(e1370) III; llcls12 (p62p::p62::RFP::unc-54 + myo-2p::GFP)</i>                                 | CF1041 x LRL160                                                                                                                                                                                                                                                                                                                                                                                                                                                                                                                                                                                                                                                                                                                                                                                                                                                                                                                                                                                                                                                                                                                           |
| LRL175                              | <i>ldrls1 (dhs-3p::dhs-3::GFP + unc-76(+)); llcls12 (sqst-1p::sqst-1::RFP::unc-54 + myo-2p::GFP)</i>    | LRL87 (LIU1 4x backcrossed into N2) x LRL160                                                                                                                                                                                                                                                                                                                                                                                                                                                                                                                                                                                                                                                                                                                                                                                                                                                                                                                                                                                                                                                                                              |
| LRL178                              | <i>hjls67 [atgl-1p::atgl-1::GFP + mec-7::RFP]; llcls12 (sqst-1p::sqst-1::RFP::unc-54 + myo-2p::GFP)</i> | VS20 x LRL160                                                                                                                                                                                                                                                                                                                                                                                                                                                                                                                                                                                                                                                                                                                                                                                                                                                                                                                                                                                                                                                                                                                             |

## Supplemental Table 6. New strains created for this study



## Supplemental Table 7

| Genes         | Direction | Sequence                            |
|---------------|-----------|-------------------------------------|
| <i>act-1</i>  | Forward   | CTACGAACTTCTGACGGACAAG              |
| <i>act-1</i>  | Reverse   | CCGGCGGACTCCATACC                   |
| <i>atgl-1</i> | Forward   | CCGGACGTCTGGTTATCTCG                |
| <i>atgl-1</i> | Reverse   | GCTCGTCGTAGATTGGCTGA                |
| <i>cyn-1</i>  | Forward   | GTGTCACCATGGAGTTGTTT                |
| <i>cyn-1</i>  | Reverse   | TCCGTAGATTGATTCACCAC                |
| <i>daf-16</i> | Forward   | ATCCAATTGTGCCAAGCACTAA              |
| <i>daf-16</i> | Reverse   | CCACCATTTTGATAGTTTCCATAGG           |
| <i>hlh-30</i> | Forward   | CTCATCGGCCGGCGCTCATC                |
| <i>hlh-30</i> | Reverse   | AGAACGCGATGCGTGGTGGG                |
| <i>hsf-1</i>  | Forward   | GCGGCTCCGTATAAGAATGCGACTAGGC        |
| <i>hsf-1</i>  | Reverse   | TTAAACCAAATTAGGATCCGATGGACTTGGAGTAC |
| <i>hsp-1</i>  | Forward   | CGCTCAGACCTTCAACCT                  |
| <i>hsp-1</i>  | Reverse   | TGGAAAGACGTCCCTTGTCG                |
| <i>inf-1</i>  | Forward   | CGGCTTGATCGAGGGAACTA                |
| <i>inf-1</i>  | Reverse   | GCCATAACGAGAGCTTGAC                 |
| <i>rpl-7</i>  | Forward   | TCAAGCGCAGAAAGCAGAGA                |
| <i>rpl-7</i>  | Reverse   | ACGAAGACGGAGGATCTGGA                |
| <i>rpl-9</i>  | Forward   | ACCTTACCCTCAAGAACCG                 |
| <i>rpl-9</i>  | Reverse   | GAAGTGGGACACGACGAACG                |
| <i>rpl-17</i> | Forward   | CGGAAAACAGACCAAGTCG                 |
| <i>rpl-17</i> | Reverse   | GATCGAGGAGGAAGTCAGCG                |
| <i>rpl-19</i> | Forward   | GTTTGGCTTCGGCCGTATTG                |
| <i>rpl-19</i> | Reverse   | AGAGCTCGTGGTAAAGGTGC                |
| <i>rpl-23</i> | Forward   | CAACACCGGAGCCAAGAATTG               |
| <i>rpl-23</i> | Reverse   | CGTTAGCAGCGATTCTTGGC                |
| <i>rps-0</i>  | Forward   | GATGTCGTCGTTGTTCCGGC                |
| <i>rps-0</i>  | Reverse   | CGGGAGATCTTCCACGGAG                 |
| <i>rps-3</i>  | Forward   | GGCTGCCAATCAAACGTGA                 |
| <i>rps-3</i>  | Reverse   | AACCTTCTCGGCGTAGAGCT                |
| <i>rps-5</i>  | Forward   | GGCCGATAACTGGGGATCTG                |
| <i>rps-5</i>  | Reverse   | GCTTCTTCCGTTGTTGCGT                 |
| <i>rps-11</i> | Forward   | CATTCGTGAGGTCGGACTCG                |
| <i>rps-11</i> | Reverse   | AAGCCCTTCTTGAGGTTCC                 |
| <i>rps-14</i> | Forward   | GGAATGAAGGTCAAGGCCGA                |
| <i>rps-14</i> | Reverse   | GCGACCTCCCTTCTTCTGG                 |
| <i>rps-16</i> | Forward   | GGTCGCCCACTTGAGTTCTT                |
| <i>rps-16</i> | Reverse   | TCCTGGTCCACCGAACTTCT                |
| <i>rps-23</i> | Forward   | GGAAAGCCGAAGGGACTCTG                |
| <i>rps-23</i> | Reverse   | GTCCGAAACCAGATACGAGCAC              |
| <i>rps-28</i> | Forward   | AGCTTACTCTTGCTCGTGCA                |
| <i>rps-28</i> | Reverse   | AGTCTTCTGGCTTCTCTCAG                |
| <i>sqst-1</i> | Forward   | TGGCTGCTGCATCATCCGCT                |
| <i>sqst-1</i> | Reverse   | TCAATCGTGCCGAGACCGGG                |

Supplemental Table 7. qPCR primers sequences
